# 1 **In vivo co-registered hybrid-contrast imaging by successive** 2 **photoacoustic tomography and magnetic resonance imaging**

## 3 **Author Information**

---

### 4 **Affiliations**

5 **Guangdong Provincial Key Laboratory of Medical Image Processing and School of Biomedical**  
6 **Engineering, Southern Medical University, Guangzhou, Guangdong, China**

7 Shuangyang Zhang, Li Qi, Xipan Li, Zhichao Liang, Jian Wu, Shixian Huang, Jiaming Liu, Zhijian  
8 Zhuang, Yanqiu Feng, Qianjin Feng and Wufan Chen

### 9 **Contributions**

10 L.Q. and S.Z. conceived the project idea and initiated the research. S.Z., S.H., Q.F. and L.Q. conceived  
11 and designed the dual-modality animal imaging bed. S.Z., X.L. and L.Q. developed all software  
12 algorithms. S.Z., J.W. and J.L. carried out the animal experiments. S.Z. and Z.L. analysed the data. S.Z.  
13 realized the final images. L.Q., S.Z. and W.C. wrote the paper. All the authors discussed the results and  
14 revised the paper.

### 15 **Corresponding authors**

16 Correspondence to: Li Qi and Wufan Chen

## 17 **Abstract**

---

18 Magnetic resonance imaging (MRI) and photoacoustic tomography (PAT) are two advanced imaging  
19 modalities that offer two distinct image contrasts: MRI has a multi-parameter contrast mechanism that  
20 provides excellent anatomical soft tissue contrast, whereas PAT is capable of mapping tissue  
21 physiological metabolism and exogenous contrast agents with optical specificity. Attempts have been  
22 made to integrate these two modalities, but rigid and reliable registration of the images for in vivo  
23 imaging is still challenging. In this paper, we present a complete hardware-software solution for the

24 successive acquisition and co-registration of PAT and MRI images in *in vivo* animal studies. Based on  
25 commercial PAT and MRI scanners, our solution includes a 3D-printed dual-modality animal imaging  
26 bed, a 3-D spatial image co-registration algorithm with bi-model markers, and a robust modality  
27 switching protocol for *in vivo* imaging studies. Using the proposed solution, we successfully  
28 demonstrated co-registered hybrid-contrast PAT-MRI imaging that simultaneously display multi-scale  
29 anatomical, functional and molecular characteristics on healthy and cancerous living mice. Week-long  
30 longitudinal dual-modality imaging of tumor development reveals information on size, border, vascular  
31 pattern, blood oxygenation, and molecular probe metabolism of the tumor micro-environment at the same  
32 time. Additionally, by incorporating soft-tissue information in the co-registered MRI image, we further  
33 show that PAT image quality could be enhanced by MRI-guided light fluence correction. The proposed  
34 methodology holds the promise for a wide range of pre-clinical research applications that benefit from the  
35 PAT-MRI dual-modality image contrast.

## 36 **Introduction**

---

37 Tomographic imaging of living animals has been an important task for preclinical research because it  
38 provides cross-sectional images of the subject without surgical intervention. This unique capability has  
39 differed it from other transmissive or reflectance imaging approaches such as whole body fluorescence  
40 imaging<sup>1</sup> or digital radiography<sup>2</sup>. Among many tomographic imaging techniques, Photoacoustic  
41 Tomography (PAT) and Magnetic Resonance Imaging (MRI) are two advanced biomedical imaging  
42 modalities that have been used in various pre-clinical imaging applications ranging from tumor  
43 screening<sup>3-7</sup>, therapy evaluation<sup>8-10</sup>, to functional brain imaging<sup>11-16</sup> and so on. In PAT, an image that maps  
44 the original energy deposition inside the target is formed by detecting and processing the ultrasonic  
45 signals generated by laser illumination<sup>17,18</sup>. PAT is able to reveal the distribution of endogenous tissue  
46 absorbers, such as oxyhemoglobin (HbO<sub>2</sub>) and deoxyhemoglobin (Hb), and exogenous optical probes,  
47 such as the FDA approved Indocyanine Green (ICG), by identifying their absorption spectrum under  
48 multiple wavelength excitations<sup>19-21</sup>. On the other hand, as a Nobel winning technology, MRI provides

49 cross-sectional images of the subject by using non-ionizing electromagnetic radiation and measuring the  
50 nuclear magnetic resonance signal, and thus enables multitudinous tissue contrast. MRI is able to provide  
51 comprehensive, multi-parametric information on anatomy, function and metabolism. Thanks to the  
52 emergence of diffusion MRI, functional MRI and other technologies, MRI has covered various clinical  
53 neurological, psychiatric, cardiac and abdominal applications<sup>22</sup>.

54 Given their outstanding imaging capabilities, these two imaging modalities are complementary at  
55 multiple dimensions. Firstly, they have distinct image contrast mechanisms. PAT provides molecular  
56 imaging capability that reflects the optical characteristics of light absorbers inside tissue<sup>23-25</sup>, whereas  
57 MRI images the density of hydrogen protons such that soft-tissue contrast is revealed. Secondly, the  
58 imaging speeds are complementary. Thanks to recent advancement in laser technology, PAT imaging  
59 speed could reach over 7000 frames per second<sup>26</sup>, whereas high-field MRI system could only acquire at  
60 most one to two images per second without sacrificing image quality<sup>27</sup>. Thirdly, their spatial resolutions  
61 are matched. Common spatial resolutions for commercial pre-clinical MRI and PAT scanners are both  
62 around tens to hundreds micrometres<sup>28</sup> given an imaging field of view of several square centimetres.  
63 Finally, PAT and MRI also share the advantages of being non-invasive, non-ionizing and label-free.

64 The benefits brought about by these complementary features of the two imaging technologies are  
65 abundant and attractive. Due to the inherent low soft tissue contrast in PAT, it is difficult to precisely  
66 identify the anatomical location of the targeted chromophores. With its combination with MRI, which  
67 provides excellent anatomical definition and soft tissue contrast, this limitation might be removed and  
68 accurate target lesion positioning and analysis could be achieved. Also, the high imaging speed of PAT  
69 could compensate for its counterpart in MRI, making dynamic imaging of transient biological activities  
70 such as neuron firing possible. Moreover, information sharing between the acquired dual-modality images  
71 might be able to help improve the image quality of one another (e.g. the structural information provided  
72 by MRI may be used to guide PAT image reconstruction or image recovery). PAT-MRI dual-modality  
73 imaging that simultaneously acquires structural, functional, and molecular images has great potential to  
74 push the image analyse focus to multiple scales, allowing for much broader preclinical research impacts.

75 Previous attempts to integrate images from these two modalities confined to either rigid registration  
76 (e.g. imaging of rigid structures such as the brain<sup>29,30</sup>) or no registration<sup>31-33</sup>. Co-registration of abdomen  
77 PAT and MRI images of small animals using a customized single-use silicone MRI holder has been  
78 reported previously<sup>34</sup>, which realized the registration of soft tissue images for the first time. Most recently,  
79 a prove-of-concept concurrent PAT-MRI imaging system has been proposed with phantom-based  
80 feasibility validation<sup>35</sup>. Development of such system requires high cost for customized instrumentation,  
81 and sacrifices the flexibility of individual system. Apart from hardware registration, robust software  
82 registration algorithms are required to precisely align the images from different modalities. Co-  
83 registration of PAT and MRI images of the brain of small animals has been proposed<sup>29</sup>. It combines  
84 mutual information based rigid registration algorithm with manually labelled anatomical landmark for the  
85 matching of the brain, which is a non-deformed object.

86 Although there were these aforementioned early demonstrations of successive or concurrent PAT-MRI  
87 imaging for various applications, implementing a rigidly co-registered, dual modality imaging solution  
88 faced significant challenges. First, PAT imaging requires coupling media (e.g. water) whereas MRI  
89 imaging does not. The purpose of the coupling media is to let the excited ultrasound to propagate.  
90 However, during modality switching, this coupling media will inevitably affect the posture of the animal.  
91 Second, MRI requires a strictly no-metal imaging environment, making the design and fabrication of a  
92 robust bimodal registration tool difficult. Third, it requires spatial resolution matching at the axial, radial,  
93 and tangential directions, simultaneously. Fourth, flexible, easy-to-use software compensation algorithms  
94 for dual-modality image registration are required for high repeatability imaging experiments. Fifth,  
95 similar to the attenuation correction in a Positron Emission Tomography/Computed Tomography  
96 (PET/CT) scanner where CT image is used to enhance PET imaging, PAT-MRI requires mutual  
97 connection and collaboration between the two modalities in order to excavate deeper information. Finally,  
98 the obtained dual-modal images from long-term in vivo longitudinal imaging should be validated, and the  
99 performance of the whole imaging protocol should be benchmarked and analysed.

100 Here, we propose a method for the successive acquisition and co-registration of PAT and MRI data in  
101 *in vivo* mice studies. The method includes a novel dual-modality imaging bed and a robust dual-modality  
102 spatial co-registration protocol. The 3D-printed imaging bed is specifically designed to secure the posture  
103 and position of the animals during modality switching. Based on this bimodal imaging bed, we design a  
104 rigorous data acquisition procedure, a stable modality switching protocol, and a highly automated data  
105 post-processing software suite to enable precise matching of the dual-modality images of the entire  
106 animal body. We demonstrate the excellent capability of this successive PAT-MRI dual-modality imaging  
107 method in *in vivo* applications including tomographic hybrid contrast observation of important organs  
108 (simultaneously structural, functional, and molecular imaging), multi-timescale longitudinal monitoring  
109 of tumor development (from minute-scale drug uptake to week-long evolution of tumor size and hypoxia  
110 condition), and structural MRI guided light fluence correction for quantitative PAT. This integrated and  
111 standardized protocol for *in vivo* small animal PAT-MRI dual-modality imaging will help unlocking and  
112 promoting even more preclinical research applications of these two modalities, such as simultaneous  
113 functional-anatomical brain imaging, bimodal contrast agent development, and anatomically specific  
114 pharmacokinetic research and etc.

## 115 **Results**

---

### 116 **Spatially co-registered successive PAT-MRI imaging.**

117 We first describe the proposed co-registered successive PAT-MRI imaging solution. Our solution is  
118 developed particularly for a 7-tesla MRI scanner (Pharmascan, Burker, Germany) and a commercial  
119 multispectral cross-sectional PAT system (MSOT inVision128, iThera Medical, Germany), both of which  
120 are among the most popular commercial imaging platforms for pre-clinical small animal imaging. The  
121 radial resolution of the MRI and PAT systems were similar (~ 150  $\mu\text{m}$ ). The axial resolution of MRI  
122 could reached <100  $\mu\text{m}$ , but for the PAT it is limited to 800  $\mu\text{m}$  (see METHODS for detail). However, the  
123 axial resolution of MRI is tunable such that the spatial resolutions, both axial and radial, are matched for  
124 the two modalities. To ensure precise spatial co-registration of the animal during modality switching, our

125 solution includes a specially designed dual-modality imaging bed (Fig. 1 a). This bed consists of a gas  
126 tube, a breathing mask, two fixing plates, two ancillary supports and a solid animal support that can be  
127 separated into two parts, one for PAT, and the other for MRI. All the components except for the gas tube  
128 are 3D printed with polylactic acid (PLA). The gas tube, made of rubber, was connected to the anesthesia  
129 gas inlet and the breathing mask to keep the animal under anesthesia. In addition, a silicone sealing pad  
130 was used to isolate the frontal part of the mouse head from water during PAT imaging. During the MRI  
131 imaging, the MRI support could be fitted into the original MRI animal bed. During the T2 spin echo  
132 sequence, the PLA material of the support will not generate interference signal to the object. During PAT  
133 imaging, the PAT support was firmly fixed on the original animal holder of the PAT system such that the  
134 animal was placed right in the centre of the detector array.

135 The image acquisition process was divided into four steps (Fig. 1c, d, Supplementary Figure 1). 1)  
136 Axial marker assignment: Chinese ink was used as markers for axial registration because it can be  
137 visualized in both MRI and PAT. The ink was marked on the skin surface of nude mice using a Gauge 20  
138 needle. The marker size was less than 1 mm and the separation distance was 1 cm such that minimum  
139 interference is caused to the images. 2) MRI imaging: the animal was fastened on the MRI support and  
140 transferred to the MRI imaging cavity, and the location of the mouse to be scanned was positioned in the  
141 center of the RF coil. During MRI imaging, we used a 2-D spin-echo sequence to scan the axial image in  
142 the XY plane. After the acquisition was completed, the dataset was resliced along the XZ and YZ  
143 directions to obtain the coronal and sagittal images. 3) Support switching: First, we used screws to fasten  
144 the MRI support on the fixing plates. Then, we unscrewed the screws on the cantilever and removed the  
145 PAT support. During this process, the body of the mouse was always in a tight state that ensured an  
146 unchanged posture. After the animal support was switched, exogenous contrast agent for PAT imaging  
147 such as ICG could be injected. 4) PAT imaging: we fix the PAT support on the original animal holder of  
148 the PAT system, and connect the gas tube to the anaesthesia port on the holder. The whole assembly was  
149 then transferred to the imaging chamber filled with distilled water pre-heated to 34-degree Celsius. The  
150 assembly was set on a built-in motorized translation stage, such that the animal could be positioned to the

151 optimal field of view. Finally, multi-spectral 3-D PAT image acquisition was carried out. When the PAT  
152 imaging section was finished, the PAT support was taken out from the imaging chamber and the animal  
153 was released. A video showing the above processes are available in Supplementary Video 1.

154 After the dual-modality imaging, post-processing of the acquired images were employed to refine the  
155 co-registration. The post-processing procedures (Fig. 1e, Supplementary Figure 3) are as follows: 1) PAT  
156 image reconstruction: to get rid of the effect of the PAT image background signal on the registration  
157 result, we used a non-negative model-based iterative image reconstruction algorithm which limits the  
158 signal value to positive during each iteration. 2) Axial registration: the ink markers on the skin surface of  
159 nude mice can be visualized on both PAT and MRI, therefore, the corresponding axial position of the  
160 images is found by locating the markers (see Supplementary Methods for details). 3) Transverse  
161 registration: after the images were axially registered, we performed transverse registration on  
162 corresponding PAT-MRI image slices by using a rigid co-registration algorithm based on mutual  
163 information. This will compensate for the small shifting or rotation of the animal during modality  
164 switching, and further align the dual-modality images. 4) Spectral un-mixing: for PAT images acquired  
165 with multispectral excitation, we perform spectral un-mixing to identify the distribution of endogenous  
166 (HbO<sub>2</sub>, Hb) or exogenous absorbers (such as ICG) from the background. The un-mixing is based on a  
167 linear algorithm<sup>21</sup> with multispectral PAT images as inputs. 5) Light fluence correction: to account for the  
168 light attenuation during its propagation in tissue, we make use of the rich and clear soft-tissue contrast in  
169 MRI to guide the estimation of the light fluence distribution during PAT imaging, and design an iterative  
170 algorithm (see METHODS for details) to correct for the light attenuation. The obtained corrected PAT  
171 images not only show evenly distributed image intensity, but also represent quantitative optical  
172 absorption and scattering coefficients of different tissues.

### 173 Co-registered anatomical imaging by PAT and MRI.

174 With the proposed successive PAT-MRI dual-modality imaging method, we achieved three-dimensional  
175 co-registered anatomical imaging of healthy and tumorous mice *in vivo*. Supplementary Fig. 4a shows the

176 corresponding PAT and MRI images at the ink marker position. In the MRI image, the ink marker can be  
177 localized easily, however, in the PAT image, the marker spreads for nearly 5 mm along the axial direction  
178 (Supplementary Fig. 4b) due to its strong optical absorption, making the identification of the correct PAT  
179 slice difficult. To tackle this, we quantified the intensity of the marker at each slice, as plotted in  
180 Supplementary Fig. 4c, and then applied Gaussian fitting to the plot. The PAT image at the peak position  
181 of the fitted curve was considered to be the correct image that matched the MRI image. Fig. 2a, b show  
182 the co-registration results of the healthy and tumorous nude mouse respectively. By resampling and  
183 interpolating the XY plane image stack, we obtained the sagittal and coronal images and displayed them  
184 in 3D as volume images. The joint visualization of the PAT and MRI images reveals successful matching  
185 of the internal structure and the consistency of the body shapes of the animal. The kidneys, spleen and  
186 spine in the axial image of healthy nude mice are correctly overlapped, and the body contours are also  
187 consistent. The tumorous mice datasets furthered demonstrated the robust performance of the co-  
188 registration strategy across week-long continuous dual-modality screening. The bright area around the  
189 centre of the tumor in the PAT image, which indicated a decrease of blood oxygen saturation, accurately  
190 matched that of the MRI image that showed weakened T2 signal (Supplementary Fig. 5). Finally, we  
191 perform quantitative evaluation of the registration performance (Fig. 2c) using the Dice Similarity  
192 Coefficient (DSC), which measures the percentage of the overlap between the two images (See  
193 Supplementary Methods). The average DSCs for healthy and tumorous mice are 93.06% and 95.12%  
194 respectively, demonstrating very high overlap between the PAT and MRI images.

### 195 Hybrid-contrast longitudinal recording of tumor growth.

196 To demonstrate the capability of simultaneously anatomical and functional imaging, PAT-MRI dual-  
197 modality longitudinal observation on nude mice bearing 4T1 tumor was performed. The successive  
198 imaging was carried out on day 3, 5, 7, 9, 11, 13 and 17 post tumor implantation. MRI-T2 images that  
199 represent structural information and HbO<sub>2</sub>, Hb, HbT images that show hypoxia microenvironment  
200 obtained from spectrally un-mixed multispectral PAT images. The image registration results and the



201 distribution of HbO<sub>2</sub> and Hb separated from the multispectral PAT images are shown in Supplementary  
202 Fig. 6. To facilitate better visualization, we used the registered MRI images as a structural priori to  
203 manually segment the tumor. As shown in the dual-modality images taken at day 17 (Fig. 3a), the MRI-  
204 T2 image showed highly corresponding tumor geometry that matched the distribution of Hb, HbO<sub>2</sub>, and  
205 HbT. The white solid-line area depicts the regions with consistent or diametrically opposite features on  
206 these images (darker in the T2 and brighter in the Hb and HbT). T2 signal represents changes in blood  
207 oxygenation, and weakens when the concentration of Hb inside the tumor increases. To further analysis  
208 the correlation between the obtained structural and functional information, profiles (Fig. 3b) of the Hb,  
209 HbO<sub>2</sub>, and HbT images were obtained along the white dashed-lines (Fig. 3a) and then compared with that  
210 of the MRI image to calculate the Pearson Correlation Coefficient (PCC) (Fig. 3c). The PCC values  
211 between T2 and Hb, HbO<sub>2</sub> and HbT are -0.9069, -0.0048 and -0.9062, respectively. The profiles show  
212 opposite spatial trends between T2 and Hb, HbT across the tumor, and the PCC values close to -1 further  
213 illustrate the negative correlation of this spatial variation. Overall, the inspection of T2 and Hb revealed  
214 the existence of negative correlation, which became higher with time (Supplementary Fig. 6). Moreover,  
215 as shown in a series of 3D fusion display using T2, Hb and HbO<sub>2</sub> images obtained during the tumor  
216 development in Fig. 3d, the growth of the tumor was accompanied by the development of neovasculature  
217 and the increase of tumor dimension. We also measured the change of tumor volume (Fig. 3e) from the  
218 MRI images and calculated the values of tumor oxygen saturation (Fig. 3f) from the distribution of Hb  
219 and HbO<sub>2</sub>. Quantitative parameters obtained from the PAT images indicated that during tumor growth,  
220 the Oxygen Saturation (SO<sub>2</sub>) increased continuously from 60.67 % on day 3 to 72.96 % on day 7 for the  
221 whole tumor area and decreased from 40.68 % on day 9 to 17.08 % on day 17 for the tumor center alone.  
222 The overall volume of the tumor reached a 6-fold increase from 47.73 mm<sup>3</sup> on day 3 to 339.75 mm<sup>3</sup> on  
223 day 17. In addition, the volume of the central region of the tumor saw a 40-fold increase from 0.44 mm<sup>3</sup>  
224 on day 7 to 17.7 mm<sup>3</sup> on day 17. This experiment demonstrated the unique capability of label free, long  
225 term structural and functional hybrid contrast imaging of the PAT-MRI bimodal imaging method.

## 226 Spatially localized high-speed imaging of molecular probes.

227 To harness the high speed imaging capability provided by PAT imaging, we applied intravenous (IV)  
228 injection of 200  $\mu\text{l}$  of ICG (0.05  $\mu\text{g}/\mu\text{l}$ ) on a day-21 4T1 tumorous mouse after MRI imaging, and then  
229 performed PAT temporal imaging of the mouse at 5-minute intervals for 40 mins. ICG, which is a FDA-  
230 approved NIR fluorochrome commonly used as a contrast agent in retinal and tumor imaging, is able to  
231 metabolize in blood-rich organs and excreted into the bile within one hour<sup>36-38</sup>. The registration results  
232 and the distribution of ICG identified from the multispectral PAT images are shown in Supplementary Fig.  
233 7. Fig. 4a shows the volumetric images of MRI-T2, HbO<sub>2</sub>, Hb and ICG at various time points. As can be  
234 seen, almost immediately after the injection, a small amount of ICG signal appeared in the tumor. Then  
235 the signal gradually increased, indicating fast deposition of the ICG inside the tumor. Nevertheless, ICG  
236 only appeared in the boundary region of the tumor, and its concentration in the central region was  
237 relatively low across the whole imaging period. This indicated a hypoxic area had been developed in the  
238 center of the tumor. Furthermore, we measured the ICG concentration at different time at both the centre  
239 and boundary regions of the tumor, and the result was shown in Fig. 4b. As can be seen, after ICG  
240 injection, there was no significant change in its concentration around tumor centre (< 5 % fluctuation).  
241 However, the ICG concentration in the boundary kept on rising around the first 20 minutes and reached a  
242 peak increase of 39.12 % at  $t = 20$  minute, and then slowly went down. This preliminary demonstration of  
243 spatially localized continuous monitoring of contrast agent reveals the potential of our proposed method  
244 for structural enhanced dynamic molecular imaging.

## 245 MRI assisted light fluence correction for quantitative PAT.

246 PAT image is the product of the absorption coefficient and the light fluence distribution<sup>39,40</sup>. Because light  
247 attenuates as it propagates into deeper tissue, to determine the concentration of the chromophores, this  
248 light attenuation effect has to be corrected. To eliminate the light fluence from the PAT image and  
249 recover the distribution of the optical absorption coefficient is of great significance. Light fluence  
250 correction method that required the segmentation of the image at organ level are proposed previously to

251 estimate the optical parameters of each region<sup>40</sup>. However, it is difficult to perform accurate organ  
252 segmentation on the PAT images alone because of its poor tissue contrast. Incorporation of co-registered  
253 MRI images might be able to solve this problem. Here, we propose MRI structural information guided  
254 light fluence estimation and correction for PAT. This method performs segmentation on the registered  
255 MRI image acquired with our dual-modality imaging approach, and then uses the segmentation result to  
256 guide the estimation of light fluence distribution (see METHODS and Supplementary Fig. 8).

257 We first performed validation of the method on phantom imaging experiments, and the results are  
258 shown in Supplementary Fig. 9. The phantom is a cylindrical tissue mimicking phantom with three rod-  
259 shape inclusions, which contained the same material at the same concentration. As can be seen, because  
260 of light attenuation, the signal intensity of the inner rod is lower than the outer rods in the uncorrected  
261 PAT image. In the corrected image, this attenuation effect has been successfully compensated for using  
262 the proposed algorithm. The profiles (Supplementary Fig. 9b) drawn along the three rod shape inclusions  
263 show that their photoacoustic signal intensity has returned to the same level after correction.

264 Next, we applied the proposed light fluence correction algorithm to the *in vivo* healthy nude mice data.  
265 Fig. 5a shows the light fluence correction results at the neck and the kidney position, including the raw  
266 PAT image (PAT), the registered MRI image (rMRI), the regions segmented on the MRI image (Prior),  
267 the light fluence distribution obtained from the optimization algorithm (Fluence), and the corrected PAT  
268 image (cPAT). As expected, the light fluence decreases radially from the surface to the center of the  
269 animal body. With the application of light fluence correction, the signal around the image centre has been  
270 significantly enhanced. And the inner kidney and the outer kidney have achieved similar signal strength  
271 compared with the original PAT image. Fig. 5b shows the 3D light fluence distribution obtained by using  
272 the proposed MRI-guided light fluence simulation method. As shown in Fig. 5c, after correction, the  
273 visibility of the blood vessels deep inside the body have also be enhanced. The proposed dual-modality  
274 PAT-MRI imaging strategy made it possible to incorporate the MRI structural information into the light  
275 fluence correction process of PAT imaging, and the above experiments have successfully demonstrated  
276 the feasibility of this technique.

## 277 **Discussion**

---

278 Visualization of complementary information derived from different imaging methods provides multiple  
279 types of image contrast, such that hidden information of the research problem may be revealed. Imaging  
280 performed successively on different modalities saves the flexibility of individual modality, but the imaged  
281 animal is easily deformed during modality switching, resulting in anatomy dislocation of the acquired  
282 images. This problem makes it difficult to accurately share information provided by the imaging methods  
283 because the image contrasts are misaligned. For successive PAT-MRI imaging, on one hand, the  
284 structural and functional contrasts, spatial resolutions, and imaging speeds of the two methods are  
285 perfectly complementary, making the implementation of such dual-modality imaging attractive. On the  
286 other hand, however, since the animal fixation methods for the two modalities are very different, the  
287 aforementioned registration problem becomes much more challenging.

288 The presented work provides a unique strategy for meeting this challenge. To ensure the posture and  
289 position of the animal during modality switching, our successive PAT-MRI imaging method involves a  
290 hardware registration device and a software toolset with automatic processing capability. On the hardware  
291 side, a novel small animal dual-modality imaging bed was designed. This 3D-printed imaging bed solves  
292 the water coupling problem in PAT imaging and ensures that the animal does not deform or displace  
293 while switching between MRI and PAT. Its introduction preserves the consistency in the shape of the  
294 entire mouse body or local lesion contour such as tumor boundary, and thereby simplifies the multi-  
295 modality image co-registration problem into a rigid registration problem solvable by standard image  
296 processing algorithms. Moreover, animal fastening method of the designed imaging bed was similar to  
297 that of the original PAT system. Therefore, PAT imaging artefacts induced by the bed was minimized and  
298 animal preparation time was not increased. The use of the breathing mask allowed for the animal to  
299 breathe freely underwater during PAT imaging and ensured high survival rate of the animals. Also,  
300 assembling and disassembling procedures of the MRI/PAT supports were designed to be both  
301 convenience and stable, such that changes in animal pose and position were subtle. The animal bed is  
302 simple to manufacture, low cost, reusable, and compatible with the harsh MRI environment. On the

303 software side, an axial registration method based on external dual-modality markers and a transverse co-  
304 registration algorithm based on mutual information between MRI and PAT were developed to further  
305 improve image co-registration performance. The Chinese ink marked on the animal surface is not only  
306 minimum invasive and harmless, but also has PAT-MRI dual contrast. With the above unique advantages,  
307 our proposed dual-modality imaging strategy offers a unified, standardized, and convenient solution to  
308 implement successive acquisition of PAT and MRI images for *in vivo* preclinical animal research.

309 Furthermore, the feasibility of the proposed strategy was demonstrated in various dual-modality  
310 imaging scenarios. Firstly, healthy nude mouse and cancerous nude mouse spatial co-registration results  
311 showed high overlap of animal anatomy on the two images, illustrating the robustness and favourable  
312 performance of the proposed strategy. Secondly, dual-modality characterization of spatial and temporal  
313 heterogeneities of the hypoxia tumor microenvironment visualized vascular pattern changes throughout  
314 the entire tumor development period, revealing the possibility of label-free, multi-contrast monitoring of  
315 cancer development. Thirdly, high speed spatial and temporal tomographic imaging of exogenous contrast  
316 agent uptake inside tumor demonstrated highly accurate structural localization of the imaging probe,  
317 allowing for the study of drug metabolism dynamics with high spatial specificity. Finally, we found that  
318 simple manual segmentation on MRI-T2 images provides valuable structural guidance to enhance the  
319 estimation of light fluence distribution in PAT imaging. This enabled accurate light fluence correction of  
320 the PAT images, and resulted in improvement of the visualization of deeply suited organs and  
321 vasculatures.

322 Based on our work, we envision vast applications by the proposed successive PAT-MRI imaging  
323 technology. For example, some studies have shown that the central hypoxia of solid tumors is related to  
324 prognosis and treatment resistance<sup>41,42</sup>. Therefore, longitudinal quantitative analysis of SO<sub>2</sub> and HbT with  
325 PAT imaging, which is able to access the hypoxic micro-environmental changes, and longitudinal tumor  
326 morphology observation with MRI imaging, which can monitoring tumor dimension and growth rate, can  
327 work together to provide a platform for the *in vivo* and *ex vivo* evaluation of anticancer therapies aimed at  
328 reducing hypoxia and inhibiting tumor angiogenesis<sup>42,43</sup>.

329 In this work, we have demonstrated the feasibility of an image acquisition and co-registration method  
330 for PAT and MRI. The design of the dual-modality animal imaging bed ensures that the deformation of  
331 the animal is within acceptable range when switching imaging modalities, thereby simplifying image co-  
332 registration. The dual-modality hybrid-contrast image obtained with our method simultaneously provides  
333 functional and structural information. This simple and reliable method can be widely implemented for  
334 various PAT-MRI dual-modality *in vivo* animal studies.

## 335 **Methods**

---

### 336 PAT-MRI dual-modality imaging bed.

337 The major purpose of the dual-modality animal imaging bed is to ensure that the animal maintains at the  
338 same positioning and posture during successive PAT and MRI imaging. Because the animal has to be  
339 bathed in water during PAT imaging, the biggest challenge is to make sure the animal position does not  
340 changed during the switching between the two imaging modalities. This was achieved by designing the  
341 animal bed according to the PAT and MRI system environment and geometric dimensions. The dual-  
342 modality imaging bed can be separated into two parts, one for PAT, and the other for MRI. All the  
343 components except the gas tube were 3D-printed with PLA material using a desktop 3D printer (Jenny3D,  
344 China).

345 *Gas tube.* A 10 mm diameter tube that connects the anaesthetic port to the breathing mask. The gas tube is  
346 made of rubber and therefore it can supply the anaesthetic gas to the animal while preventing water from  
347 entering the mask.

348 *Breathing mask.* The breathing mask functions like a swimming goggle except that it only covers the  
349 mouth and nose of the animal. It includes a funnel-shaped structure, a built-in copper wire, and a sealing  
350 silicone pad. One small end of the mask is connected to the anaesthetic port through the gas tube. The  
351 other end of the mask is sealed with a silicone pad with a small hole in the center, such that the frontal  
352 part of the mouth head fits into the hole. The copper wire is mounted transversely inside the breathing

353 mask for hooking the teeth of the mouse during PAT imaging. In this way, the mouse face can be closely  
354 fitted to the silicone sealing pad, and drowning of the animal can be prevented. The mask also helps to  
355 keep the mouse head steady during imaging.

356 *Fixing plates and ancillary supports.* Both the left and right sides of the imaging bed contained the fixing  
357 plate and the ancillary support. The functions of the two fixing plates include: 1) to fix the animal onto the  
358 PAT and MRI supports, and 2) to bind the limbs of the mouse and fix the breathing mask. These fixing  
359 plates can be firmly attached to the imaging supports by using plastic or copper screws, and then the arms  
360 and legs of the animal can also be tied to the support. The two ancillary supports are used to support the  
361 torso of the mouse. The interested imaging regions can be selected by simply adjusting the positions of  
362 the two ancillary supports. Supplementary Fig. 2 demonstrates four types of fixing plates and ancillary  
363 supports for the imaging of different parts of the animal body.

364 *PAT support.* It includes two components: the mounting plate and the cantilever, which were assembled  
365 by screw combination. The mounting plate can be perfectly attached on the original animal holder of the  
366 PAT system, and can be translated in the axial direction of the nude mouse (less than 1cm) to facilitate the  
367 connection of the gas tube. The cantilever was fastened to the fixing plates by screws such that the animal  
368 to be imaged is in a suspended state. This design centers the animal in the ring-shape detector, and lets  
369 none obstruction appeared along the sound propagation path. In this way, the PAT image quality can be  
370 ensured.

371 *MRI support.* A curved base-plate used to fix the animal during MRI imaging by screwing to the fixing  
372 plates. The MRI support is adapted to the body contour of the animal, prevents the animal from  
373 deformation, and matches the shape of the original MRI bed.

#### 374 Spatial co-registration algorithm of the PAT and MRI images.

375 The spatial co-registration algorithm of the PAT and MRI images contains the following steps. Step 1)  
376 image pre-processing: perform image reconstruction, denoising, and background removal on the collected

377 multi-modal data. Step 2) axial registration with external markers: locate the corresponding position of  
378 the multi-modality cross-sectional images by Gaussian fitting. Step 3) 2D transverse co-registration:  
379 register the 2D bi-modal images with an automated rigid transverse registration algorithm. Evaluation of  
380 co-registration accuracy by calculating the DSC was performed after the above software co-registration  
381 was done. The schematic of the proposed spatial co-registration algorithm is shown in Supplementary Fig.  
382 3.

### 383 Light fluence estimation and correction method.

384 The PAT images are formed by reconstructing the original point source of the ultrasonic waves generated  
385 by absorbing the laser pulse, and the pixel value  $p(\vec{r})$  in the image is expressed as:

$$386 \quad p(\vec{r}) = \alpha \Gamma u_a(\vec{r}) \Phi \left[ \vec{r}, u_a(\vec{r}), u'_s(\vec{r}) \right], \quad (1)$$

387 where  $\alpha$  denotes the system response,  $\Gamma$  denotes the thermo-elastic Gruneisen parameter,  $u_a(\vec{r})$  and  
388  $u'_s(\vec{r})$  denotes the absorption coefficient and the scattering coefficient,  $\Phi$  denotes the light fluence  
389 within a voxel at the position  $\vec{r}$ . To perform light fluence correction, we first simulate the light fluence  
390 distribution  $\Phi$  over the imaging field-of-view, and then calculate the fluence corrected PAT image by  $\Phi$   
391 using the following equation:

$$392 \quad u_a(\vec{r}) = \frac{p'(\vec{r})}{\Phi \left[ \vec{r}, u_a(\vec{r}), u'_s(\vec{r}) \right]}, \quad (2)$$

393 where we make the reasonable assumption that  $p'(\vec{r})$  has been reconstructed from the acoustic  
394 measurements accurately and with negligible structural distortion<sup>17,18</sup>.

395 To make use of the structural information provided by the MRI images, we designed and implemented an  
396 iterative optimization method to calculate the absorption and scattering coefficients. The schematic of the  
397 algorithm is as shown in Supplementary Fig. 8. To improve the convergence speed of the absorption



398 coefficient  $u_a$  optimization, we manually segmented the registered MRI images into different organ  
399 regions  $R_N$ . These regions exhibited small changes in hemoglobin content and oxygen saturation, and  
400 therefore the optical parameters could be considered uniform within an individual region. The  
401 segmentation result was later used as prior information for light fluence estimation. We assigned  
402 specifically one absorption coefficient and one scattering coefficient to each region according to  
403 reference<sup>40,44</sup> and then use this as a constraint to solve the light fluence simulation problem. In the  
404 optimization algorithm, the light fluence distribution was modelled by the diffusion equation, and solved  
405 by using the Toast++ toolbox<sup>45</sup> in MATLAB (Mathworks, US). The finite element method (FEM) was  
406 employed in the Toast++ toolbox to model the light transport inside the object and the optimization of the  
407 objective function was implemented with the built-in minimization function ‘fmincon’ in MATLAB. For  
408 initialization, the absorption coefficient varied from  $0 \text{ mm}^{-1}$  to  $1 \text{ mm}^{-1}$ , and the scattering coefficient was  
409 limited to be within a  $\pm 10\%$  variation range.

#### 410 **Animal models.**

411 All animal experiments were approved by the local Animal Ethics Committee of Southern Medical  
412 University and were performed in accordance with current guidelines. In the *in vivo* animal imaging  
413 experiment, 6 healthy nude mice (12-15 g/each, female, Southern Medical University, Guangzhou, China),  
414 and 4 nude mice carrying 4T1 mammary carcinoma (Southern Medical University Cancer Institute,  
415 Guangzhou, China) were used. Animals were kept in ventilated cages inside a temperature-controlled  
416 room, under a 12-h dark/light cycle. In order to reduce abdominal peristalsis artifacts caused by food  
417 digestion and to prevent the mice from excreting and polluting the imaging environment during PAT  
418 imaging, the nude mice were fasted for 8 hours before imaging.

#### 419 **Magnetic resonance imaging.**

420 All MRI scan were performed on a 7 T small animal MRI system (Pharmascan, Bruker, Germany)  
421 operated by ParaVision 6.0 software platform. A 1H transmit-receive volume coil with 40 mm inner

422 diameter was used for signal transmitting and receiving. The animal was anesthetized with 4 % chloral  
423 hydrate at 0.01 ml/g. We assembled the MRI support, fixed the limbs of the anesthetized animal on the  
424 fixing plates on both sides, and hooked the teeth of the nude mouse on the copper wire in the breathing  
425 mask. In order to reduce the image artefacts caused by respiratory movements, medical oxygen mixed  
426 with high concentration isoflurane (1%, RWD, China) was transmitted through the gas tube to the  
427 breathing mask, so that the respiratory rate of nude mice was maintained at 15-20 times/min. The body  
428 temperature of the nude mouse was monitored using the rectal probe of a small animal monitoring system  
429 (Model 1030, Small Animal Instruments Inc., New York, NY, USA), and stabilized at  $37 \pm 0.1$  °C using  
430 the heater module. The T2 MRI images of nude mouse were obtained using a 2-D spin echo sequence  
431 (Turbo rapid acquisition with refocused echoes) with the following imaging parameters: RARE factor 8,  
432 echo time 10 ms, repetition time 6000 ms, 5 averages, slice thickness/gap 0.8/0.2 mm, field of view  $25 \times$   
433  $25$  mm<sup>2</sup>, matrix  $250 \times 250$ , spatial resolution  $0.1 \times 0.1 \times 0.8$  mm<sup>3</sup>. Sagittal T2 images of the YZ plane  
434 where the markers located were firstly acquired. Based on these images, the slice direction and position of  
435 the axial image was selected so that each marker was at the centre of the slice and the slice direction was  
436 perpendicular to the long-axis of the animal. The axial T2 images covering either the upper or lower parts  
437 of nude mouse were then acquired because the coil's effective imaging range was insufficient to cover the  
438 entire mouse.

### 439 Photoacoustic tomography imaging.

440 A commercial small animal multispectral photoacoustic tomography system (MSOT inVision128, iThera  
441 Medical, Germany, Fig. 1d) was employed to perform all the PAT imaging. A pulsed OPO laser (670 nm  
442 - 960 nm tunable) with pulse width <10 ns, repetition rate of 10 Hz and a peak pulse energy of 60 mJ at  
443 760 nm is employed in this PAT system. The laser light excites the sample through a ten-arm fiber bundle,  
444 which provides a diffused, homogeneous, and 360-degree illumination over the surface of the animal. The  
445 generated ultrasonic waves are detected by 128 toroidally focused ultrasound transducers with a centre

446 frequency of 5 MHz (60% bandwidth) arranged over an azimuth span of 270-degrees around the cylinder  
447 with a radius of curvature of 41 mm (Fig. 1d).

448 When switching to PAT imaging, we needed to assemble the PAT support on the fixing plates with  
449 screws first, and then removed the MRI support. This is to ensure that the posture of the animal did not  
450 changed during the modality switching process. Finally, the animal-fixed PAT support was attached to  
451 the original PAT holder which aligned it with the center of the transducer and immersed the animal in  
452 34 °C heated water for ultrasonic coupling and warm keeping. All nude mice were anesthetized with 1%  
453 isoflurane during imaging. Whole body imaging was realized by translating the PAT support axially with  
454 the built-in motorized translation stage. For contrast enhanced PAT, an insulin injection needle was  
455 embedded into the tail vein in advance, and was connected to a long Polyethylene Tubing 10 (PE 10) that  
456 enabled contrast agents injection (such as ICG) from outside the imaging chamber. Multispectral PAT  
457 images were acquired at five different illumination wavelengths: 700, 730, 760, 800 and 850 nm and  
458 averaged with signals from 10 frames per wavelength. The ultrasound time series signals are then  
459 reconstructed into 2D pressure maps using a model-based iterative reconstruction algorithm with a 30 ×  
460 30 mm field-of-view at 300× 300 pixels. During image reconstruction, the pressure value is limited to  
461 positive because the negative value only reflects the artifacts caused by the incomplete geometry of the  
462 system. Finally, the linear unmixing algorithm<sup>21</sup> was used to calculate the distribution of HbO<sub>2</sub>, Hb and  
463 ICG.

#### 464 **Statistical analysis.**

465 Matlab (MathWorks Inc.) and GraphPad Prism software (GraphPad Software Inc.) were used for  
466 statistical analyses and graph drawing.

#### 467 **Data Availability**

---

468 The data that support the findings of this study are available from the corresponding authors upon  
469 reasonable request.

## 470 **References**

- 471 1 Frangioni, J. V. In vivo near-infrared fluorescence imaging. *Current Opinion in Chemical*  
472 *Biology* **7**, 626-634, doi:<https://doi.org/10.1016/j.cbpa.2003.08.007> (2003).
- 473 2 Chotas, H. G., Dobbins, J. T., 3rd & Ravin, C. E. Principles of digital radiography with  
474 large-area, electronically readable detectors: a review of the basics. *Radiology* **210**, 595-  
475 599, doi:10.1148/radiology.210.3.r99mr15595 (1999).
- 476 3 Ivankovic, I., Mercep, E., Schmedt, C. G., Dean-Ben, X. L. & Razansky, D. Real-time  
477 Volumetric Assessment of the Human Carotid Artery: Handheld Multispectral  
478 Optoacoustic Tomography. *Radiology*, 181325, doi:10.1148/radiol.2019181325 (2019).
- 479 4 Lin, L. *et al.* Single-breath-hold photoacoustic computed tomography of the breast. *Nat*  
480 *Commun* **9**, 2352, doi:10.1038/s41467-018-04576-z (2018).
- 481 5 Knieling, F. *et al.* Multispectral Optoacoustic Tomography for Assessment of Crohn's  
482 Disease Activity. *N Engl J Med* **376**, 1292-1294, doi:10.1056/NEJMc1612455 (2017).
- 483 6 Stoffels, I. *et al.* Metastatic status of sentinel lymph nodes in melanoma determined  
484 noninvasively with multispectral optoacoustic imaging. *Sci Transl Med* **7**, 317ra199,  
485 doi:10.1126/scitranslmed.aad1278 (2015).
- 486 7 Neuschler, E. I. *et al.* A Pivotal Study of Optoacoustic Imaging to Diagnose Benign and  
487 Malignant Breast Masses: A New Evaluation Tool for Radiologists. *Radiology* **287**, 398-  
488 412, doi:10.1148/radiol.2017172228 (2018).
- 489 8 Haedicke, K. *et al.* High-resolution optoacoustic imaging of tissue responses to vascular-  
490 targeted therapies. *Nat Biomed Eng* **4**, 286-297, doi:10.1038/s41551-020-0527-8 (2020).
- 491 9 Li, X. *et al.* Supramolecular Phthalocyanine Assemblies for Improved Photoacoustic  
492 Imaging and Photothermal Therapy. *Angew Chem Int Ed Engl* **59**, 8630-8634,  
493 doi:10.1002/anie.201916147 (2020).
- 494 10 Padhani, A. R. Functional MRI for anticancer therapy assessment. *Eur J Cancer* **38**,  
495 2116-2127, doi:10.1016/s0959-8049(02)00388-x (2002).
- 496 11 Moonen, C. T., van Zijl, P. C., Frank, J. A., Le Bihan, D. & Becker, E. D. Functional  
497 magnetic resonance imaging in medicine and physiology. *Science* **250**, 53-61,  
498 doi:10.1126/science.2218514 (1990).
- 499 12 deCharms, R. C. Applications of real-time fMRI. *Nat Rev Neurosci* **9**, 720-729,  
500 doi:10.1038/nrn2414 (2008).
- 501 13 Logothetis, N. K. What we can do and what we cannot do with fMRI. *Nature* **453**, 869-  
502 878, doi:10.1038/nature06976 (2008).
- 503 14 Nasiriavanaki, M. *et al.* High-resolution photoacoustic tomography of resting-state  
504 functional connectivity in the mouse brain. *Proc Natl Acad Sci U S A* **111**, 21-26,  
505 doi:10.1073/pnas.1311868111 (2014).
- 506 15 Lv, J. *et al.* In vivo photoacoustic imaging dynamically monitors the structural and  
507 functional changes of ischemic stroke at a very early stage. *Theranostics* **10**, 816-828,  
508 doi:10.7150/thno.38554 (2020).
- 509 16 Wang, X. *et al.* Noninvasive laser-induced photoacoustic tomography for structural and  
510 functional in vivo imaging of the brain. *Nat Biotechnol* **21**, 803-806, doi:10.1038/nbt839  
511 (2003).
- 512 17 Li, X. *et al.* Model-Based Optoacoustic Tomography Image Reconstruction With Non-  
513 local and Sparsity Regularizations. *Ieee Access* **7**, 102136-102148,  
514 doi:10.1109/Access.2019.2930650 (2019).

- 515 18 Qi, L. *et al.* Cross-sectional photoacoustic tomography image reconstruction with a multi-  
516 curve integration model. *Computer Methods and Programs in Biomedicine* **197**,  
517 doi:10.1016/j.cmpb.2020.105731 (2020).
- 518 19 Zhang, S. *et al.* Photoacoustic imaging of living mice enhanced with a low-cost contrast  
519 agent. *Biomed Opt Express* **10**, 5744-5754, doi:10.1364/BOE.10.005744 (2019).
- 520 20 Li, X. *et al.* Multispectral Interlaced Sparse Sampling Photoacoustic Tomography. *IEEE*  
521 *Transactions on Medical Imaging*, 1-1, doi:10.1109/tmi.2020.2996240 (2020).
- 522 21 Keshava, N. & Mustard, J. F. Spectral unmixing. *IEEE Signal Processing Magazine* **19**,  
523 44-57, doi:10.1109/79.974727 (2002).
- 524 22 Yousaf, T., Dervenoulas, G. & Politis, M. Advances in MRI Methodology. *Int Rev*  
525 *Neurobiol* **141**, 31-76, doi:10.1016/bs.irm.2018.08.008 (2018).
- 526 23 Wang, L. V. & Hu, S. Photoacoustic tomography: in vivo imaging from organelles to  
527 organs. *Science* **335**, 1458-1462, doi:10.1126/science.1216210 (2012).
- 528 24 Wang, L. V. & Yao, J. A practical guide to photoacoustic tomography in the life sciences.  
529 *Nat Methods* **13**, 627-638, doi:10.1038/nmeth.3925 (2016).
- 530 25 Nie, L. & Chen, X. Structural and functional photoacoustic molecular tomography aided  
531 by emerging contrast agents. *Chem Soc Rev* **43**, 7132-7170, doi:10.1039/c4cs00086b  
532 (2014).
- 533 26 Sivasubramanian, K. & Pramanik, M. High frame rate photoacoustic imaging at 7000  
534 frames per second using clinical ultrasound system. *Biomedical Optics Express* **7**,  
535 doi:10.1364/boe.7.000312 (2016).
- 536 27 Glasser, M. F. *et al.* The Human Connectome Project's neuroimaging approach. *Nat*  
537 *Neurosci* **19**, 1175-1187, doi:10.1038/nn.4361 (2016).
- 538 28 Ntziachristos, V. & Razansky, D. Molecular imaging by means of multispectral  
539 optoacoustic tomography (MSOT). *Chem Rev* **110**, 2783-2794, doi:10.1021/cr9002566  
540 (2010).
- 541 29 Ren, W. *et al.* Automated registration of magnetic resonance imaging and optoacoustic  
542 tomography data for experimental studies. *Neurophotonics* **6**, 025001,  
543 doi:10.1117/1.NPh.6.2.025001 (2019).
- 544 30 Ni, R., Vaas, M., Ren, W. & Klohs, J. Noninvasive detection of acute cerebral hypoxia  
545 and subsequent matrix-metalloproteinase activity in a mouse model of cerebral ischemia  
546 using multispectral-optoacoustic-tomography. *Neurophotonics* **5**, 015005,  
547 doi:10.1117/1.NPh.5.1.015005 (2018).
- 548 31 Ju, Y. *et al.* Monodisperse Au-Fe<sub>2</sub>C Janus Nanoparticles: An Attractive Multifunctional  
549 Material for Triple-Modal Imaging-Guided Tumor Photothermal Therapy. *ACS Nano* **11**,  
550 9239-9248, doi:10.1021/acsnano.7b04461 (2017).
- 551 32 Ke, K. *et al.* Copper Manganese Sulfide Nanoplates: A New Two-Dimensional  
552 Theranostic NanoplatforM for MRI/MSOT Dual-Modal Imaging-Guided Photothermal  
553 Therapy in the Second Near-Infrared Window. *Theranostics* **7**, 4763-4776,  
554 doi:10.7150/thno.21694 (2017).
- 555 33 Hupple, C. W. *et al.* A light-fluence-independent method for the quantitative analysis of  
556 dynamic contrast-enhanced multispectral optoacoustic tomography (DCE MSOT).  
557 *Photoacoustics* **10**, 54-64, doi:10.1016/j.pacs.2018.04.003 (2018).
- 558 34 Gehrung, M., Tomaszewski, M., McIntyre, D., Disselhorst, J. & Bohndiek, S. Co-  
559 registration of optoacoustic tomography and magnetic resonance imaging data from

- 560 murine tumour models. *Photoacoustics* **18**, 100147, doi:10.1016/j.pacs.2019.100147  
561 (2020).
- 562 35 Ren, W., Dean-Ben, X. L., Augath, M. A. & Razansky, D. Development of concurrent  
563 magnetic resonance imaging and volumetric optoacoustic tomography: A phantom  
564 feasibility study. *J Biophotonics* **14**, e202000293, doi:10.1002/jbio.202000293 (2021).
- 565 36 Sakka, S. G. & van Hout, N. Relation between indocyanine green (ICG) plasma  
566 disappearance rate and ICG blood clearance in critically ill patients. *Intensive Care Med*  
567 **32**, 766-769, doi:10.1007/s00134-006-0109-6 (2006).
- 568 37 Liu, Y. *et al.* Highly specific noninvasive photoacoustic and positron emission  
569 tomography of brain plaque with functionalized croconium dye labeled by a radiotracer.  
570 *Chem Sci* **8**, 2710-2716, doi:10.1039/c6sc04798j (2017).
- 571 38 Zhang, D. *et al.* Cell membrane coated smart two-dimensional supraparticle for in vivo  
572 homotypic cancer targeting and enhanced combinational theranostics. *Nanotheranostics* **5**,  
573 275-287, doi:10.7150/ntno.57657 (2021).
- 574 39 Yao, L., Sun, Y. & Jiang, H. Quantitative photoacoustic tomography based on the  
575 radiative transfer equation. *Opt Lett* **34**, 1765-1767, doi:10.1364/ol.34.001765 (2009).
- 576 40 Brochu, F. M. *et al.* Towards Quantitative Evaluation of Tissue Absorption Coefficients  
577 Using Light Fluence Correction in Optoacoustic Tomography. *Ieee Transactions on*  
578 *Medical Imaging* **36**, 322-331, doi:10.1109/Tmi.2016.2607199 (2017).
- 579 41 Li, J. *et al.* Spatial heterogeneity of oxygenation and haemodynamics in breast cancer  
580 resolved in vivo by conical multispectral optoacoustic mesoscopy. *Light: Science &*  
581 *Applications* **9**, doi:10.1038/s41377-020-0295-y (2020).
- 582 42 Martin, J. D., Fukumura, D., Duda, D. G., Boucher, Y. & Jain, R. K. Reengineering the  
583 Tumor Microenvironment to Alleviate Hypoxia and Overcome Cancer Heterogeneity.  
584 *Cold Spring Harb Perspect Med* **6**, doi:10.1101/cshperspect.a027094 (2016).
- 585 43 Albin, A., Tosetti, F., Li, V. W., Noonan, D. M. & Li, W. W. Cancer prevention by  
586 targeting angiogenesis. *Nat Rev Clin Oncol* **9**, 498-509, doi:10.1038/nrclinonc.2012.120  
587 (2012).
- 588 44 Alexandrakis, G., Rannou, F. R. & Chatziioannou, A. F. Tomographic bioluminescence  
589 imaging by use of a combined optical-PET (OPET) system: a computer simulation  
590 feasibility study. *Physics in Medicine and Biology* **50**, 4225-4241, doi:10.1088/0031-  
591 9155/50/17/021 (2005).
- 592 45 Schweiger, M. & Arridge, S. The Toast++ software suite for forward and inverse  
593 modeling in optical tomography. *J Biomed Opt* **19**, 040801,  
594 doi:10.1117/1.JBO.19.4.040801 (2014).

## 595 **Acknowledgements**

---

596 This work was supported by National Natural Science Foundation of China (31700857), Guangzhou  
597 Science and Technology Program (201804010375), Pearl River Talented Young Scholar Program  
598 (2017GC010282) and Guangdong Provincial Key Area R&D Program (2018B030333001).



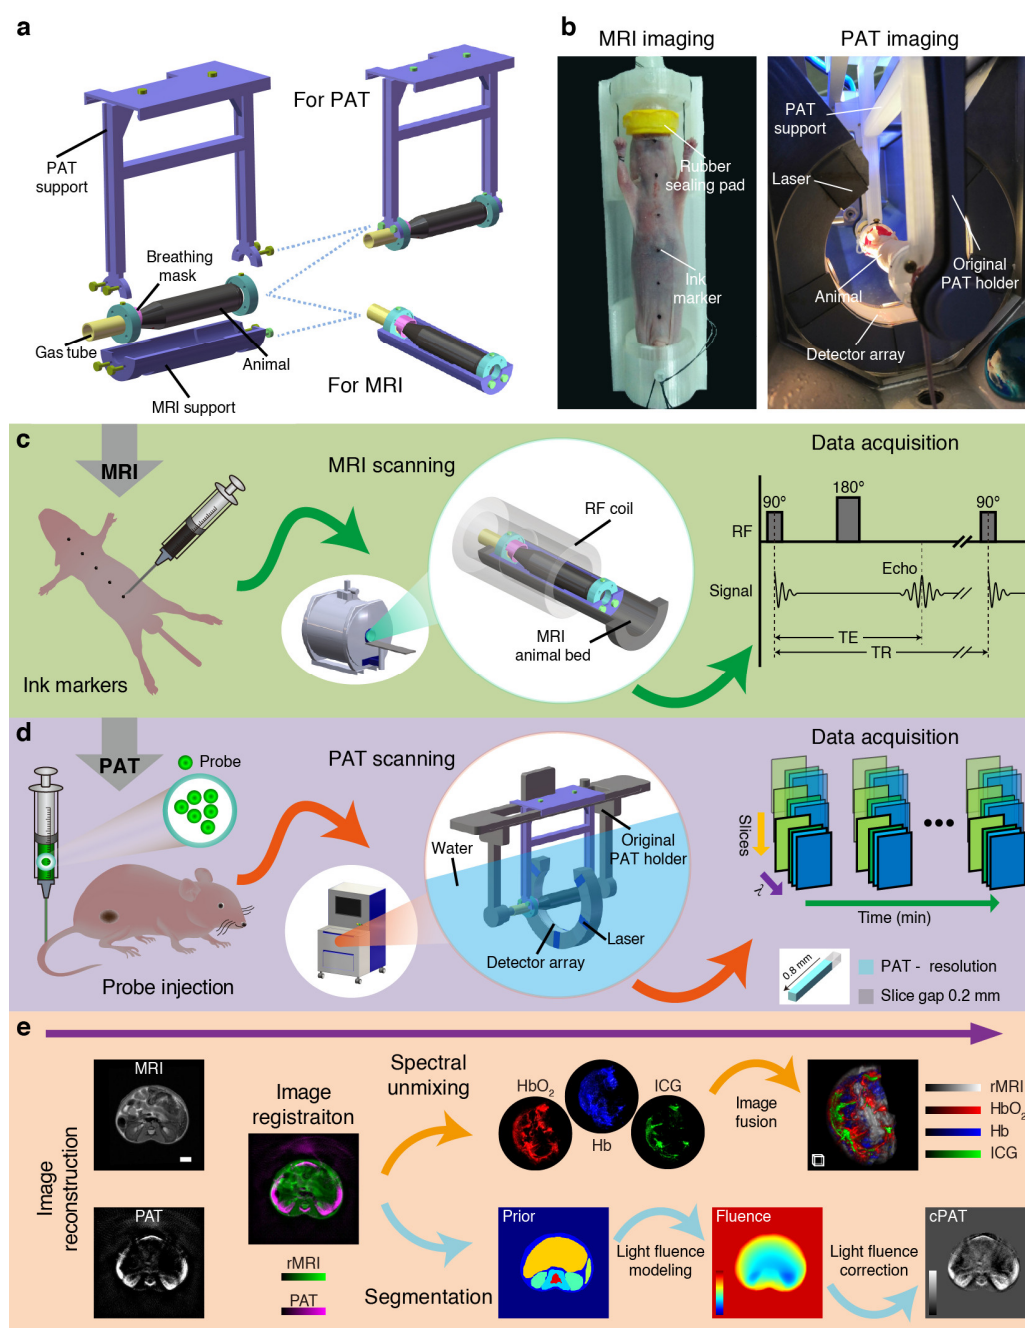

**Fig. 1 Co-registered hybrid-contrast imaging of living mice by successive PAT and MRI.** **a** The dual-modality imaging bed includes a PAT support, a MRI support, a gas tube, a breathing mask, two fixing plates and two ancillary supports. Image acquisition for the two modalities can be realized by assembling different components. **b** Photographs of a nude mouse placed on the animal bed before MRI and during PAT imaging. **c** MRI image acquisition process. Axial marker assignment: the skin surface of nude mice is marked with Chinese ink. MRI scanning: after assembling the MRI support, the animal was placed on the animal bed and transferred to the centre of the magnet for scanning. MRI data acquisition: a 2-D spin echo sequence was used to acquire MRI images. **d** PAT image acquisition process. Probe injection: optional exogenous probe such as ICG was injected through the tail vein. PAT scanning: after assembling the PAT support, the animal was loaded into the PAT imaging chamber filled with water for scanning. PAT data acquisition: 5-D multi-wavelength multi-slice longitudinal PAT images are acquired. **e** Image post-processing process. This process includes image reconstruction, image registration, spectral unmixing, image fusion, and PAT light fluence correction. See text and Supplementary Methods for more detail on image post-processing. Scale bars, 3 mm. Scale box, 1 mm<sup>3</sup>. Details of the dual-modality imaging bed are shown in Supplementary Video 1 and Supplementary figure 1 and 2.

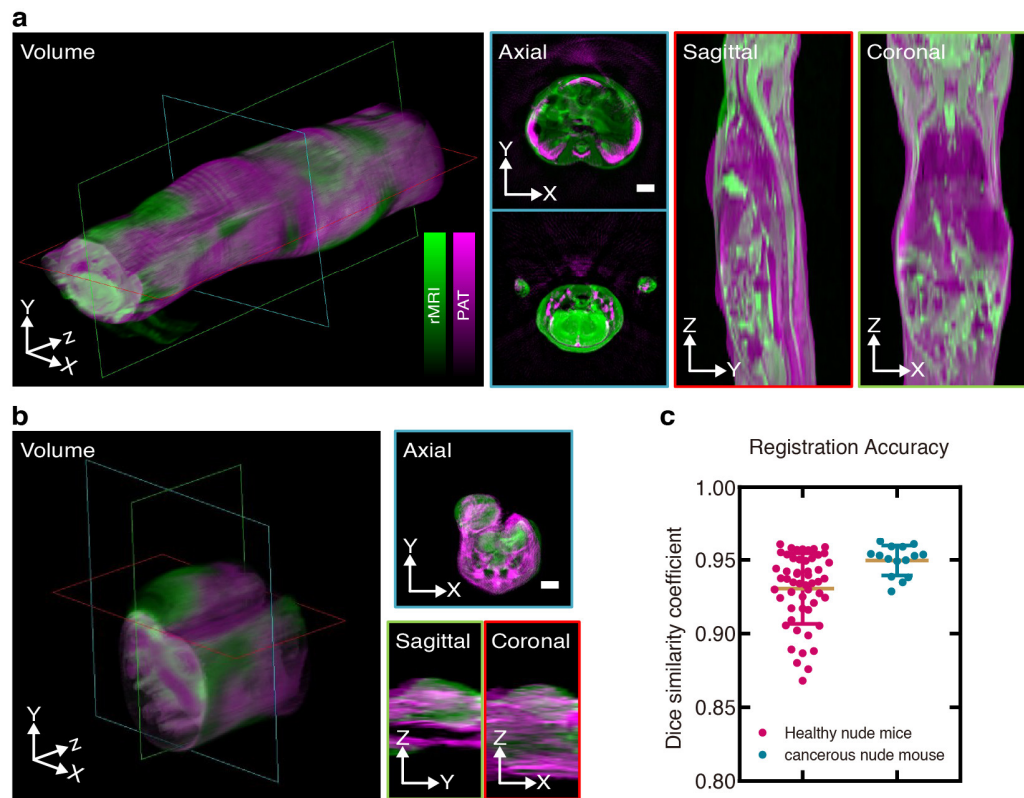

**Fig. 2 Spatial co-registration results.** **a** The registered PAT-MRI dual-modality images from healthy nude mouse. **b** The registered PAT-MRI dual-modality images from tumorous nude mouse. All images in **(a)** and **(b)** are displayed with pseudo-color overlay (magenta for PAT and green for MRI). All sagittal and coronal images are resampled and interpolated from the XY plane image stack, and display in 3D as volume images. **c** Quantification of the co-registration accuracy in Dice similarity coefficient using image data from **(a)** and **(b)**. Scale bars, 3 mm.



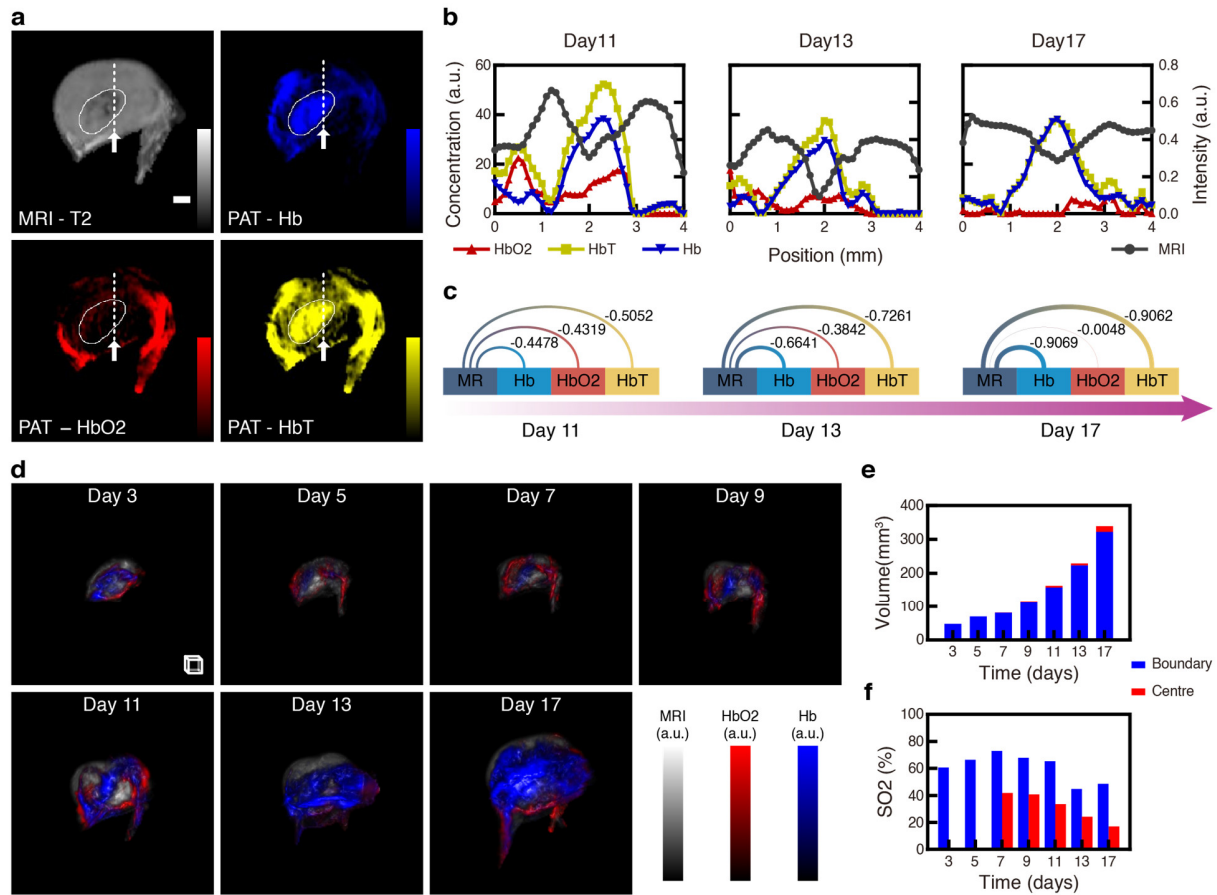

**Fig. 3 Week-long longitudinal monitoring of tumor dimension and hypoxia microenvironment in living nude mouse by PAT-MRI imaging.** **a** MRI image and PAT-derived Hb, HbO<sub>2</sub> and HbT images in the central XY plane of the 4T1 tumor. The white solid-line area depicts the regions with similar or opposite features. **b** Image profiles drawn along the straight white dashed-lines in **(a)**. **c** Pearson correlation coefficients of the profiles between the Hb, HbO<sub>2</sub>, HbT images and the MRI image. **d** 3D fusion display of MRI images and Hb, HbO<sub>2</sub> images in longitudinal imaging of the 4T1 tumor. We delineated the mask of hypoxic regions inside the tumor and computed the volume size **(e)** from MRI images and the blood oxygen saturation **(f)** from PAT images in the centre and boundary of the tumor separately. Scale bar, 1 mm. Scale box, 1 mm<sup>3</sup>. See also Supplementary Fig. 6 and Supplementary Video 2.

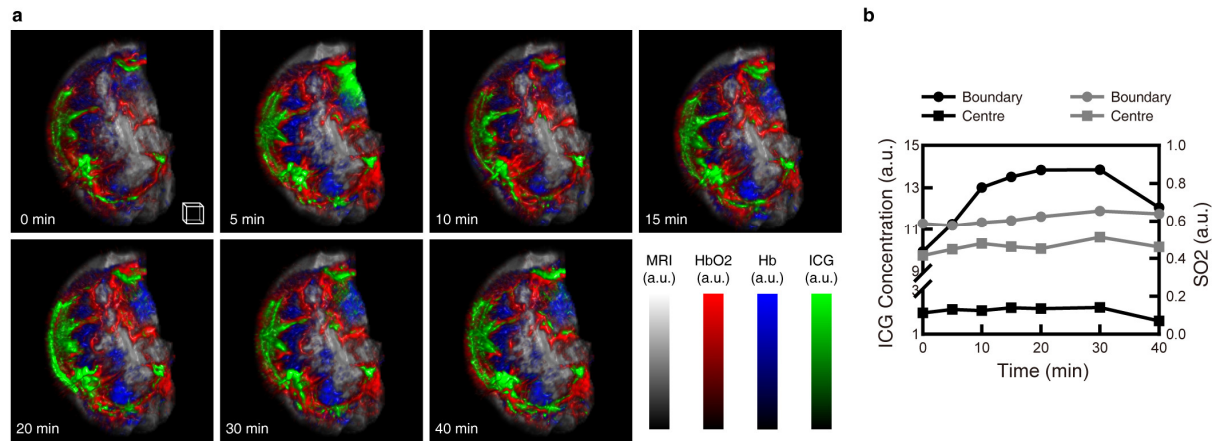

**Fig. 4 Temporal anatomical-molecular imaging of ICG perfusion inside 4T1 tumor.** **a** 3D fusion display of the Hb, HbO<sub>2</sub>, ICG distributions on top of a co-registered MRI image of the 4T1 tumor microenvironment. PAT images were acquired at a 5 minute interval. **b** Time trace of the ICG concentration and SO<sub>2</sub> of the hypoxic centre and boundary region of the tumor. Scale box, 1 mm<sup>3</sup>. See Supplementary Video 3.

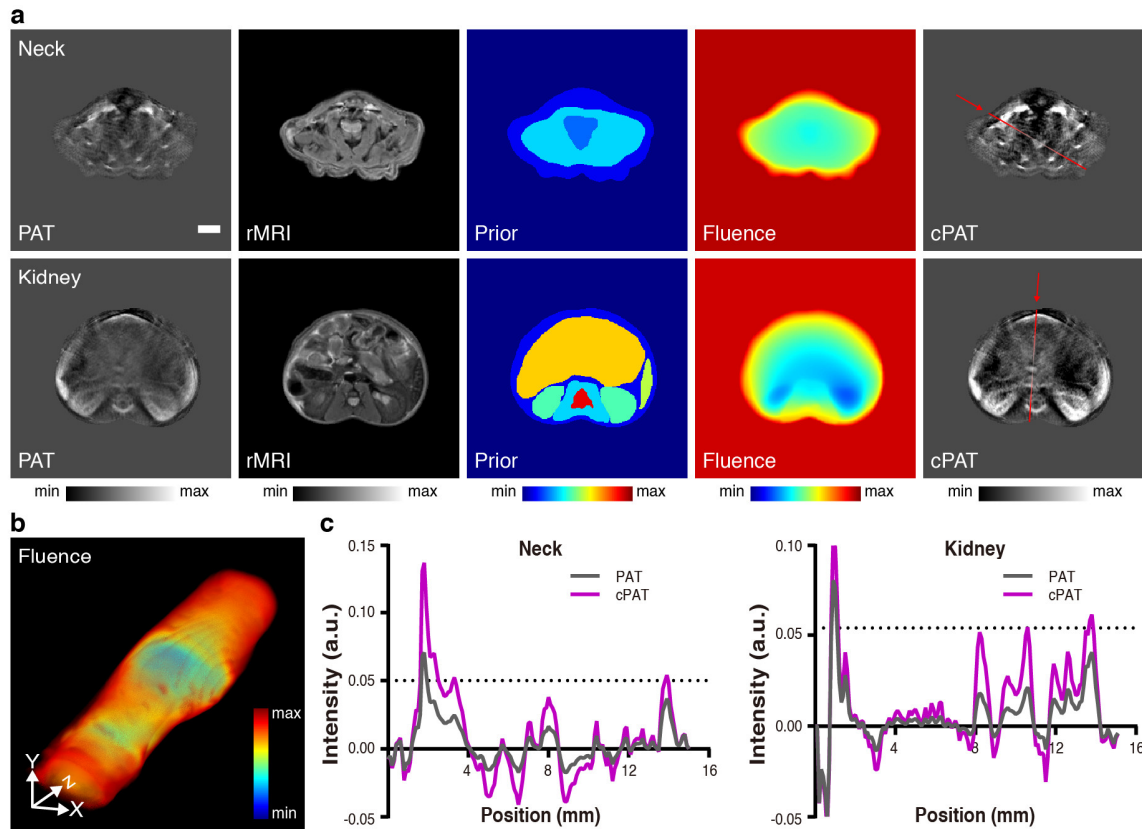

**Fig. 5 MRI structural guided light fluence correction for nude mouse PAT imaging *in vivo*.** **a** Light fluence correction results at the neck and the kidney position. PAT: raw PAT images. rMRI: co-registered MRI images. Prior: organ-level MRI segmentation results used to guide light fluence estimation. Fluence: light fluence distribution solved by the proposed optimization algorithm based on the Prior image. cPAT: light fluence corrected PAT images. **b** 3D view of light fluence distribution obtained with structural guidance from MRI. **c** Image profiles drawn along the straight red solid lines in (a). PAT imaging wavelength: 700 nm. Scale bar, 3 mm. The 3D segmentation results of MRI images and the obtained 3D light fluence distribution are shown in Supplementary Video 4.
